# Supplementary material for: Combined genetic effects of EGLN1 and VWF modulate thrombotic outcome in hypoxia revealed by Ayurgenomics approach
Source: PubMed Central journal article supplement (PMC4457985; doi:10.1186/s12967-015-0542-9), 2015-06-06
Supplement: 12967_2015_542_MOESM1_ESM.pdf [file 12967_2015_542_MOESM1_ESM.pdf]

**Ayurveda descriptions about Blood characteristics, hemopoiesis, and inter- individual variability associated with it**

**Effect of lifestyle and dietary practices as well as prolonged exposure to a geo-climatic condition and seasonal variations on hemopoiesis**

विधिना शोणितं जातं शुद्धं भवति देहिनाम् ।  
देशकालौकसात्म्यानां विधिर्यः संप्रकाशितः ॥३॥-

C.Su.24/3

सात्म्यशब्दस्य देशादिभिः प्रत्येकमन्वयः | ओकसात्म्यम् अभ्याससात्म्यम्  
Chakrapani commentary on C.Su.24/3

**Effect of time, season and weather conditions on blood characteristics**

**Hypercoagulability in cold and cloudy weather conditions**

तत्र, दुर्दिने दुर्विद्धे शीतवातयोरस्विन्ने भुक्तमात्रे स्कन्दत्वाच्छोणितं न स्रवत्यल्पं  
वा स्रवति ॥२७॥ - Su. Su.14

दुर्दिने इति मेघाच्छादितेऽहिनि।

अनृतौ दुर्दिने चेत्यादौ शीतदोषानित्यनेन शीतकाले

Chakrapani on Su.Su.14/27

शीतवातयोरिति कालकृतो दोषः Dalhana on Su.Su. 14/27

**Characteristics of blood with respect to colour**

तपनीयेन्द्रगोपाभं पद्मालक्तकसन्निभम् ।

गुञ्जाफलसवर्णं च विशुद्धं विधि शोणितम् ॥२२॥ - C.su. 24

## Inter-individual variability in normal color of blood

विशुद्धरक्तलिङ्गे नानावर्णता वातादिप्रकृतित्वान्मनुष्याणाम्

Chakrapani commentary on C.Su.24/22

## Physiological role of Blood described in Ayurveda

Health, Immunity, skin complexion, carrier of vital breath (oxygen carrying), and longevity

तद्विशुद्धं हि रुधिरं बलवर्णसुखायुषा ।

युनक्ति प्राणिनं प्राणः शोणितं ह्यनुवर्तते ॥४॥ -C.su. 24

## Altered characteristics of blood due to vitiation by Vata, Pitta and Kapha

अरुणाभं भवेद्वाताद्विशदं फेनिलं तनु ।

पित्तात् पीतासितं रक्तं स्त्यायत्यौष्ण्याच्चिरेण च ॥२०॥

prolonged bleeding time

ईषत्पाण्डु कफाद्दुष्टं पिच्छिलं तन्तुमद्धनम् । thick blood

संसृष्टलिङ्गं संसर्गात् त्रिलिङ्गं सान्निपातिकम् ॥२१॥ C. Su.24

## Pitta related disorders include excessive bleeding tendencies inflammation etc

पित्तविकारांश्चत्वारिंशतमत ऊर्ध्वमनुव्याख्यास्यामः- ऊष्माधिक्यं च,

शोणितक्लेदश्च, मांसक्लेदश्च, त्वग्दाहश्च, (मांसदाहश्च), -----

रक्तपित्तं च, रक्तमण्डलानि च, जीवदानं च, तमःप्रवेशश्च, इति चत्वारिंशत्पित्त

विकाराः पित्तविकाराणामपरिसंख्येयानामविष्कृततमा व्याख्याताः ॥१४॥

- C. Su.20/14

**Kapha related disorders includes obesity, cardiovascular disorders, atherosclerosis etc**

श्लेष्मविकारांश्च विंशतिमत ऊर्ध्वं व्याख्यास्यामः, तद्यथा-तृप्तिश्च, तन्द्रा च, निद्राधिक्यं च,--- स्तैमित्यं च, हृदयोपलेपश्च, कण्ठोपलेपश्च, ----- धमनीप्रति(वि)चयश्च, गलगण्डश्च, अतिस्थौल्यं च, शीताग्निता च, उदरदश्च, श्वेतावभासता च, श्वेतमूत्रनेत्रवर्चस्त्वं च, इति विंशतिः श्लेष्मविकाराः श्लेष्मविकाराणामपरिसंख्येयानामा- विष्कृततमा व्याख्याता भवन्ति ।।१७।।

- C. Su.20/15

**Effect of geo climatic condition on health profile of residents including their strengths, disease susceptibilities, diet, lifestyle practices etc**

तत्र भूमिपरीक्षा आतुरपरिज्ञानहेतोर्वा स्यादौषधपरिज्ञानहेतोर्वा । तत्र तावादियमातुरपरिज्ञानहेतोः । तद्यथा- अयं कस्मिन् भूमिदेशे जातः संवृद्धो व्याधितो वा, तस्मिंश्च भूमिदेशे मनुष्याणामिदमाहारजातम्, इदं विहारजातम्, इदमाचारजातम्, एतावच्च बलम्, एवंविधं सत्त्वम्, एवंविधं सात्म्यम्, एवंविधो दोषः, भक्तिरियम्, इमे व्याधयः, हितमिदम्, अहितमिदमिति प्रायोग्रहणेन । औषधपरिज्ञानहेतोस्तु कल्पेषु भूमिपरीक्षा वक्ष्यते ।।१३।। **C.Vi.8/93**

Suitability of diet, LS, disease prevalence etc

**Ayurveda assigns Prakriti to habitats based on its characteristics wherein High mountain regions are Kapha vata dominant where diseases of Kapha Vata nature are more prevalent**

त्रिविधः खलु देशः-जाङ्गलः, आनूपः, साधारणश्चेति ।  
अथानूपो हिन्तालतमालनारिकेलकदलीवनगहनः, -----  
क्षितिधरनिकुञ्जोपशोभितः मन्दपवना- नुवीजिताक्षितिरुहगहनः,  
अनेकवनराजीपुष्पितवनगहनभूमिभागः, -----सुकुमारपुरुषः,  
पवनकफप्रायो ज्ञेयः, --- ॥८॥ - C.Ka. 1/8

देशस्त्वानूपो जाङ्गलः साधारण इति । तत्र, बहूदकनिम्नोन्नतनदीवर्षगहनो  
मृदुशीतानिलो बहुमहापर्वतवृक्षो मृदुसुकुमारोपचितशरीरमनुष्यप्रायः  
कफवातरोगभूयिष्ठश्चानूपः, ----- ॥४२॥

-Su.Su.35/40

**Diet and life style recommendations for maintenance of health are  
based on individual's Prakriti, habitat, season etc**

देशकालात्मगुणविपरीतानां हि कर्मणामाहारविकाराणां च क्रियोपयोगः  
सम्यक्, ----- स्वस्थवृत्तमेतावद्धातूनां साम्यानुग्रहार्थमुपदिश्यते ॥८॥  
-C. Sa.6/8
